# Supplementary material
Source: publisher figshare collection journal article supplement (https://gsapubs.figshare.com/ndownloader/files/22747337)
Supplement: Supplementary file 1 [file 22747337]

## EXPANDED DISCUSSION OF METHODS AND RESULTS

An expanded version of Table 1, showing additional calculations and results, is shown in Table 1 Supp. Table 2 Supp. shows isotopic data compiled from GEOROC and other sources. Table 3 Supp. shows parental liquid compositions, derived from methods discussed in Putirka et al. (2007), and used here to estimate  $T^{ol-liq}$  and  $T_p$ .

### Calculation Strategy and Selection of Input Parameters

Estimates of mantle potential temperature,  $T_p$  can be derived from olivine-liquid equilibration temperatures ( $T^{ol-liq}$ ) provided we know: 1) the FeO content of mantle-derived liquids that are “parental” ( $\text{FeO}^p$ ) to erupted lavas, 2) the maximum forsterite ( $\text{Fo}_{\text{max}}$ ) content of mantle olivines with which such parental liquids equilibrated, 3) the oxygen fugacity ( $f\text{O}_2$ ) conditions during melting, and 4) the Fe-Mg exchange coefficient between olivine and liquid,  $K_D(\text{Fe-Mg})^{ol-liq} = (X_{\text{Mg}}^{\text{liq}} X_{\text{Fe}}^{\text{ol}}) / (X_{\text{Mg}}^{\text{ol}} X_{\text{Fe}}^{\text{liq}})$  (where  $X_i^j$  is the cation fraction of element  $i$  in phase  $j$ ).

### Estimating $\text{FeO}^p$

The quantity  $\text{FeO}^p$  can be derived from plots of MgO v. FeO, when whole rocks or glasses lie on an “olivine control” line. The ocean islands evaluated by this study are limited to those where available data indicate that olivine control was achieved. Olivine control means that olivine addition or subtraction controls whole rock and liquid compositions (Powers, 1955). This occurs for primitive, parental liquids because parental liquids have high MgO, and precipitate only olivine when delivered to shallow depths. It has long been recognized (e.g., Langmuir and Hanson, 1980) that because Fe is partitioned nearly equally between olivine and co-existing liquid, trends of olivine fractionation/addition tend to be flat (note that the liquid lines of descent in Fig. 1 for

## Supplementary Document

Siqueiros and Hawaii do not provide a mechanisms to generate high FeO, high MgO liquids, from low FeO, high MgO parental liquids). FeO along such trends thus reflects the FeO content of parental, mantle-derived liquids (Langmuir et al., 1992; Putirka, 2005). The 28 ocean islands of this study were selected due to availability of high MgO compositions; nearly all ocean islands examined reach olivine control at >10% MgO (Fig. 1). Jan Mayen and Galapagos are exceptions. Most lavas in these islands trend to very low FeO at high MgO, but both regions are also near spreading centers, and so may be affected by mixing with ambient mantle. For example, Fernandina is the only Galapagos island to yield very high  $^3\text{He}/^4\text{He}$ , but published data from this island yield a mix of low and high FeO lavas, with no clear FeO-MgO trend, and so  $T_p$  at Fernandina cannot be reliably estimated.

Other input parameters

As for the remaining quantities needed for temperature estimation, they are assumed equal for ocean islands and MORs:  $f\text{O}_2$  is QMF-1 (Bezos and Humler, 2005), and  $K_D(\text{Fe-Mg})^{\text{ol-liq}}=0.31$  (Herzberg and O'Hara, 2002; Putirka, 2005; Toplis, 2005), and  $\text{Fo}_{\text{max}} = 91.5$  (Albarede, 1992; Kelemen et al., 1997; Asimow and Longhi, 2004; Putirka et al., 2007). Reported Fe analyses are re-calculated to  $\text{Fe}^{2+}\text{O}$ -total (FeO) (Bezos and Humler, 2005; Kress and Carmichael, 1988). A database of 3,070 analyses of ocean island olivine compositions confirms that globally,  $\text{Fo}_{\text{max}}$  for ocean islands lies in the range  $91.5\pm0.5$ . It cannot be precluded that  $f\text{O}_2$  conditions are different for ocean islands and MOR, or vary from one ocean island to another. However,  $f\text{O}_2$  studies at Hawaii (Rhodes and Vollinger, 2005) and Iceland (Heister et al., 2004) indicate broadly similar conditions as at MORs, that if adopted for all ocean islands, would not bias results by

## Supplementary Document

more than 10°C. Water also affects  $T^{ol-liq}$ , and it has been suggested that hot spots are not hot, but wet (Bonatti, 1990; Green et al., 2001). Since Dixon et al. (2002) have established that ocean island source regions indeed contain greater water contents (0.075 wt. % H<sub>2</sub>O, compared to 0.01% H<sub>2</sub>O in the depleted MORB source), their source differences and bulk distribution coefficient for H<sub>2</sub>O, are adopted for calculating  $T^{ol-liq}$  (Table 1). (To calculate H<sub>2</sub>O, melt fraction,  $F$ , is calculated from equations A1 and A2 of Putirka et al. (2007); see Calculation details, below).

Some anti-plume advocates (e.g., Falloon et al., 2007) suggest that only glass compositions (which may have lower MgO and FeO compared to whole rocks) should be considered for  $T$  estimation. But “liquids” provide a highly homogenized account of mantle melting processes (e.g., Langmuir et al., 1992) and do not preserve the most primitive melt compositions produced by partial melting. For example, because olivine-rich magmas are denser than their evolved counterparts, it has long been recognized that the MgO contents of glass compositions, and the sum of all erupted products (crystals and liquids), necessarily yield minimum estimates for parental MgO<sup>liq</sup> (e.g., Wright, 1973; Clague et al., 1991). Olivine and whole rock compositions from the recent Hawaiian Scientific Drilling Project validate this view, that Hawaiian parental liquids have picrite compositions (Putirka et al., 2007). Many studies (e.g., Langmuir and Hanson, 1980; Clague et al., 1995; Rhodes and Vollinger, 2004; Asimow and Longhi, 2004; Herzberg et al., 2007), even those by anti-plume advocates (Falloon et al., 2007), also quantitatively demonstrate that FeO contents along olivine control lines cannot be generated by fractionation of liquids with substantially lower FeO contents—they must derive from parental liquids that have similar, or higher FeO. These conclusions are unaffected by the

## Supplementary Document

recognition that some high-SiO<sub>2</sub> liquids may derive by reaction with harzburgite (Wagner and Grove, 1998; Stolper et al., 2004), as such wall-rock reaction decreases FeO contents (Fig. 1).

### Calculations and Results

$T^{ol-liq}$  is estimated (Fig. 2) using thermometers from Putirka et al. (2007), which account for variations in  $P$  and H<sub>2</sub>O, and anhydrous models from Beattie (1993) (modified to apply at very high  $P$ ; Herzberg and O'Hara, 2002). Though calibrated with different experimental data, these models exhibit remarkably similar levels of accuracy and precision ( $\pm 40$ -50°C) (Putirka et al., 2007) and yield similar  $T^{ol-liq}$  estimates (Table 1). All three thermometers account for variations in SiO<sub>2</sub><sup>P</sup> and (Na<sub>2</sub>O+K<sub>2</sub>O)<sup>P</sup> (as in FeO<sup>P</sup>, these are the SiO<sub>2</sub> and Na<sub>2</sub>O+K<sub>2</sub>O for primitive liquids). Estimates of SiO<sub>2</sub><sup>P</sup> and (Na<sub>2</sub>O+K<sub>2</sub>O)<sup>P</sup> at each ocean island are obtained by averaging lavas that have 10wt.%<MgO<15wt.%, and adding olivine until such liquids achieve Fe-Mg exchange equilibrium with Fo91.5 olivine;  $F$  is calculated using equation A1 (Table 1) from Putirka et al. (2007)) from these calculated liquid compositions;  $F$  averages 11% for ocean island primitive liquids.  $F$  can also be calculated using equation A2 in Putirka et al. (2007), which is based on experiments performed using enriched peridotite compositions from Pickering-Witter and Johnston (2000); using equation A2, the average for  $F$  among ocean islands is 20%. Table 1 Supp shows calculations for  $T_p$  and  $T_{ex}$  a moderately enriched mantle source,  $T_p(En)$  and  $T_{ex}(En)$ , based on the mean  $F$  calculated from equations A1 and A2 (average ocean island  $F = 16\%$ ), for mantle potential temperature,. Olivine compositions are selected by projecting FeO-MgO trend lines to their intersection with an

## Supplementary Document

olivine composition trend line; if olivine is added along liquid lines of descent (the olivine fractionation trend in Fig. 1), nearly identical parental liquid compositions are calculated. Melt fraction,  $F$ , is calculated using the composition- and pressure-dependent equation A1 of Putirka et al. (2007), and this  $F$  is used to calculate  $H_2O^p$  (using Dixon et al.'s (2002) estimates for  $H_2O$  in the ocean island and MOR source regions).  $T^{ol-liq}$  values are converted to  $T_p$  using  $F$ , a mantle adiabat,  $dT/dP$ , of 12.1 °C/GPa, and a thermal correction for the heat of fusion ( $\Delta T^{corr} = F\Delta H_{fusion}/Cp$ ;  $\Delta H_{fusion} = 128.3$  kJ/mole;  $Cp = 192$  J/mole•K; Putirka, 2005);  $T_p = T^{ol-liq} + \Delta T^{corr} - P(dT/dP)$ . Results are in Table 1.

For ambient mantle, temperatures are calculated using mean MORB FeOt, which happens to be nearly identical to mean FeOt for primitive lavas from Siqueiros (Perfit et al., 1996) (Fig. 1). Putirka et al. (2007) have shown that, globally, MORB vary over a very narrow temperature interval, with  $1\sigma$  as low as  $\pm 35$ -40°C. This result is not inconsistent with temperature estimates by Langmuir et al. (1992), who did not calculate a standard deviation or an average MORB temperature, but rather a range of MORB temperatures, which included Iceland (see Putirka et al., 2007).

Since equilibration of parental liquids with Fo91.5 olivine does not occur at Earth's surface, but most likely below the base of the crust (Putirka, 1997; Klügel and Klein, 2006), all calculations are performed at 1 GPa. However, although this assumed value for  $P$  affects estimates of  $T^{ol-liq}$ , it has only a minimal impact on  $T_p$ . For example, by calculating  $T_p$  (from  $T^{ol-liq}$ ) at MORs in 1GPa intervals, from 1 atm to 5 GPa, the average  $T_p$  and standard deviation are:  $T_p^{MOR} = 1414 \pm 24^\circ\text{C}$ . This standard deviation is less than thermometer error, and results from the fact that higher  $T^{ol-liq}$  estimates (at higher  $P$ ) are

## Supplementary Document

offset by a greater degree of cooling due to adiabatic upwelling, and a smaller positive correction to  $T_p$  related to the heat of fusion (Putirka et al., 2007).

Interestingly, the anhydrous thermometer of Beattie (1993) yields intermediate  $T^{ol-liq}$  estimates (Table 1) compared to H<sub>2</sub>O-dependent models (Putirka et al., 2007) (Table 1 Supp), indicating that H<sub>2</sub>O contents at ocean islands might be low enough that the effects of inter-ocean island variations in H<sub>2</sub>O are likely subsumed by model error. If all oceanic volcanic sources are assumed to be anhydrous, mean  $T_{ex}$  is between 195-205°C, and the temperature for ambient mantle,  $T_p^{MORs} = 1411^\circ\text{C}$ . The excess temperatures of Table 1 and Table 1 Supp, are also similar to those derived by an entirely different method, involving partial melting (Herzberg et al., 2007).

Differences between these T estimates, and Putirka et al. (2007)

The estimates for  $T_p^{MORs}$ ,  $T_p^{Samoa}$  and  $T_p^{Hawaii}$  are less than the estimates of Putirka et al. (2007). Most fall within or near the  $1\sigma$  error of 80°C for error on  $T_p$  (Putirka et al., 2007). The present estimate for MORB is lower by 30-40°C because in Putirka et al. (2007), they considered all MORB with 7 wt. % < FeOt < 9.5 wt. %, to calculate mean FeOt for MORB, regardless of MgO. However, MORB with >9.5% MgO have slightly lower FeOt (8.18%) because by using high MgO samples, those MORB that have been affected by plagioclase fractionation are completely excluded (plagioclase fractionation increases FeOt). The Putirka et al. (2007) estimate of mean MORB FeOt (8.8%) is therefore an upper limit to mean FeOt for MORB, as is their estimate of  $T_p^{MORs}$ . Notably, the average obtained using high MgO MORB from PETDB is remarkably similar to that obtained from picrites from Siquieros (8.14%; Perfit et al., 1996). Temperatures are also slightly lower because here, values for  $T^{ol-liq}$  are calculated using an average of models

## Supplementary Document

(2) and (4) from Putirka et al. (2007) and Beattie (1993). Tests of these models in Putirka et al. (2007) show that each of these models yield similar mean errors for experimental data, even though they are calibrated using different variables and equations. The current judgment is that it is probably best to average results from all three expressions. Finally, for Samoa, FeO<sub>t</sub> contents for data published in GEOROC trend to somewhat lower values than considered in Putirka et al. (2007), and use of this larger database results in lower temperatures.

**REFERENCES CITED**

- Albarede, F., 1992, How deep do common basaltic magmas form and differentiate?:  
Journal of Geophysical Research, v. 97, p. 10997-11009.
- Asimow, P.D., and Longhi, J., 2004, The significance of multiple saturation points in the  
context of polybaric near-fractional melting: Journal of Petrology, v. 45, p. 2349-2367.
- Beattie, P., 1993, Olivine-melt and orthopyroxene-melt equilibria: Contributions to  
Mineralogy and Petrology, v. 115, p. 103-111.
- Bezous, A., and Humler, E., 2005, The Fe<sup>3+</sup>/ΣFe ratios of MORB glasses and their  
implications for mantle melting: Geochimica et Cosmochimica Acta, v. 69, p. 711-  
725.
- Bonatti, E., 1990, Not so hot “hot spots” in the oceanic mantle: Science, v. 250, p. 107-  
111.
- Clague, D.A., Moore, J.G., Dixon, J.E., and Friesen, W.B., 1995, Petrology of submarine  
lavas from Kilauea’s Puna Ridge, Hawaii: Journal of Petrology, v. 36, p. 299-349.
- Clague, D.A., Weber, W.S., and Dixon, J.E., 1991, Picritic glasses from Hawaii: Nature,

## Supplementary Document

v. 353, p. 553-556.

Class, C., and Goldstein, S.L., 1997, Plume-lithosphere interactions in the ocean basins: constraints from the source mineralogy: *Earth and Planetary Science Letters*, v. 150, p. 245-260.

Class, C., Goldstein, S., Altherr, R., and Bachèlery, P., 1998, The process of plume-lithosphere interactions in the ocean basins—the case of Grande Comore: *Journal of Petrology*, v. 39, p. 881-903.

Class, C., Goldstein, S.L., Stute, M., Kurz, M.D., and Schlosser, P., 2005, Grand Comore Island: a well-constrained “low- $^3\text{He}/^4\text{He}$ ” mantle plume: *Earth and Planetary Science Letters*, v. 233, p. 391-409.

Claude-Ivanaj, C., Bourdon, B., and Allègre, C., 1998, Ra-Th-Sr isotope systematics in Grande Comore Island: a case study of plume-lithosphere interaction: *Earth and Planetary Science Letters*, v. 164, p. 99-117.

Dixon, J.E., Leist, L., Langmuir, C., and Schilling, J-G., 2002, Recycled dehydrated lithosphere observed in plume-influenced mid-ocean-ridge basalt: *Nature*, v. 420, 385-389.

Doucet, S., Moreira, M., Weis, D., Scoates, J.S., Giret, A., and Allègre, C., 2006, Primitive neon and helium isotopic compositions of high-MgO basalts from the Kerguelen archipelago, Indian Ocean: *Earth and Planetary Science Letters*, v. 241, p. 65-79.

Falloon, T.J., Danyushevsky, L.V., Ariskin, A., Green, D.H., and Ford, C.E., 2007, The



## Supplementary Document

- application of olivine geothermometry to infer crystallization temperatures of parental liquids: implications for the temperature of MORB magmas, *Chemical Geology*, v. 241, p. 207-233.
- Geist, D., White, W.M., Albarede, F., Harpp, K., Reynolds, R., Blichert-Toft, J., and Kurz, M.D., 2002, Volcanic evolution in the Galapagos: the dissected shield of Volcan Ecuador, *Geochemistry, Geophysics, Geosystems*, v. 3, doi:10.1029/2002GC000355.
- Green, D.H., Falloon, T. J., Eggins S.M., and Yaxley, G.M., 2001, Primary magmas and mantle temperatures: *European Journal of Mineralogy*, v. 13, p. 437-451.
- Heister, L.E., Gras, M.A., and Leshner, C.E., 2004, Mantle redox conditions in the North Atlantic Igneous Province: *Eos Transactions, American Geophysical Union*, v. 85, p. 47.
- Herzberg, C., Asimow, P.D., Arndt, N., Niu, Y., Leshner, C.M., Fitton, J.G., Chedle, M.J., and Saunders, A.D., 2007, Temperatures in ambient mantle and plumes: constraints from basalts, picrites and komatiites: *Geochemistry, Geophysics, Geosystems*, v. 8, doi:10.1029/2006GC001390.
- Herzberg, C. & O'Hara, M.J., 2002, Plume-associated ultramafic magmas of Phanerozoic age: *Journal of Petrology*, v. 43, p. 1857- 1883.
- Honda, M., and Woodhead, J.D., 2005, A primordial solar-neon enriched component in the source of EM-I-type ocean island basalts from the Pitcairn Seamounts, Polynesia: *Earth and Planetary Science Letters*, v. 236, p. 597-612.
- Hopp, J., and Tireloff, M., 2005, Refining the noble gas record of the Réunion mantle plume source: implications on mantle geochemistry: *Earth and Planetary Science Letters*, v. 240, p. 573-588.

## Supplementary Document

- Kelemen, P.B., Koga, K., and Shimuzu, N., 1997, Geochemistry of gabbro sills in the crust-mantle transition zone of the Oman ophiolite: implications for the origin of the oceanic lower crust: *Earth and Planetary Science Letters*, v. 146, p. 475-488.
- Klügel, A., and Klein F., 2006, Complex magma storage and ascent at embryonic submarine volcanoes from the Madeira Archipelago: *Geology*, v. 34, p. 337-340.
- Kress, V.C., and Carmichael, I.S.E., 1988, Stoichiometry of the iron oxidation reaction in silicate melts: *American Mineralogist*, v. 73, p. 1267-1274.
- Kurz, M.D., Curtice, J., and Lott, D.E.III, 2004, Rapid helium isotopic variability in Mauna Kea shield lavas from the Hawaiian Scientific Drilling Project: *Geochemistry, Geophysics, Geosystems*, v. 5, doi:10.1029/2002GC000439.
- Langmuir, C.H., and Hanson, G.N., 1980, An evaluation of major element heterogeneity in the mantle sources of basalts: *Philosophical Transactions of the Royal Society of London, A*, v. 297, p. 383-407.
- Langmuir, C.H., Klein, E.M., and Plank, T., 1992, Petrological systematics of mid-ocean ridge basalts: constraints on melt generation beneath ocean ridges: *in* Morgan, J.P., Blackman, D.K., and Sinton, J.M., eds., *Mantle Flow and Melt Generation at Mid-Ocean Ridges: Geophysical Monograph 71*, American Geophysical Union, Washington DC, pp 183-280.
- MacPherson, C.G., Hilton, D.R., Day, J.M.D., Lowry, D., and Grönvold, K., 2005, High- $^3\text{He}/^4\text{He}$ , depleted mantle and low- $\delta^{18}\text{O}$ , recycled oceanic lithosphere in the source of central Iceland magmatism: *Earth and Planetary Science Letters*, v. 233, p. 411-427.
- Perfit, M.R., Fornari, D.J., Ridley, W.I., Kirk, P.D., Casey, J., Kastens, K.A., Reynolds,

## Supplementary Document

- J.R., Edwards, M., Desonie, D., Shuster, R., and Paradis, S., 1996, Recent volcanism in the Siqueiros transform fault: picritic basalts and implications for MORB magma genesis, *Earth and Planetary Science Letters*, v. 141, p. 91-108.
- Pickering-Witter, J., and Johnston, A.D., 2000, The effects of variable bulk composition on the melting systematics of fertile peridotitic assemblages, *Contrib. Mineral. Petrol.*, 140, 190-211.
- Powers, H.A., 1955, Composition and origin of basaltic magma of the Hawaiian Islands: *Geochimica et Cosmochimica Acta*, v. 7, p. 77-107.
- Putirka, K., 1997, Magma transport at Hawaii: inferences based on igneous thermobarometry, *Geology*, 25, 69-72.
- Putirka, K., 2005, Mantle potential temperatures at Hawaii, Iceland, and the mid-ocean ridge system, as inferred from olivine phenocrysts: Evidence for thermally-driven mantle plumes: *Geochemistry, Geophysics, Geosystems*, doi: 10.1029/2005GCGC000915.
- Putirka, K., Perfit, M. Ryerson F.J., and Jackson, M.G., 2007, Ambient and Excess Mantle Temperatures, Olivine Thermometry, and Active vs. Passive Upwelling: *Chemical Geology*, v. 241, p. 177-206.
- Rhodes, J.M., and Vollinger, M.J., 2005, Ferrous/Ferric Ratios in 1984 Mauna Loa Lavas: A Contribution to Understanding the Oxidation State of Hawaiian Magma: *Contributions to Mineralogy and Petrology*, v. 149, p. 666-674.
- Stolper, E., Sherman, S., Garcia, M., Baker, M., and Seaman, C., 2004, Glass in the submarine section of the HSDP-2 drill core, Hilo, Hawaii, v. 5, doi: 10.1029/2003GC000553.
- Toplis, M.J., 2005, The thermodynamics of iron and magnesium partitioning between

## Supplementary Document

- olivine and liquid: criteria for assessing and predicting equilibrium in natural and experimental systems: *Contributions to Mineralogy and Petrology*, v. 149, p. 22-39.
- Wagner, T.P., and Grove, T.L., 1998, Melt/harzburgite reaction in the petrogenesis of theoleiitic magma from Kilauea volcano, Hawaii, *Contributions to Mineralogy and Petrology*, v. 131, p. 1-12.
- Wright, T.L., 1973, Magma mixing as illustrated by the 1959 eruption, Kilauea volcano, Hawaii: *Geological Society of America Bulletin*, v. 84, p. 849-858.
- Workman, R.K., Hart, S.R., and Jackson, M., 2004, Recycled metasomatized lithosphere as the origin of the Enriched mantle II (EM2) end-member: evidence from the Samoa volcanic chain: *Geochemistry, Geophysics, Geosystems*, v. 5, doi:10.1029/2003GC000623.

## Supplementary Document

Table DR1. Expanded version of Table 1 in paper.

|                       | H <sub>2</sub> O <sup>pl</sup> | F    | (1)<br>$T_{ol}^{ol-}$<br>liq(°C) | (2)<br>$T_{ol}^{ol-}$<br>liq(°C) | (3)<br>$T_{ol}^{ol-}$<br>liq(°C) | Corr<br>T to<br>Tp | Mean<br>$T_{ol}^{ol-}$<br>liq(°C) | Mean<br>$T_p$ (°C) | $T_{ex}$ (°C) | H <sub>2</sub> O <sup>p</sup><br>to get<br>$T_{ex}=0$ | $T_p$ (En) | $T_{ex}$ (En) |
|-----------------------|--------------------------------|------|----------------------------------|----------------------------------|----------------------------------|--------------------|-----------------------------------|--------------------|---------------|-------------------------------------------------------|------------|---------------|
| <b>Ambient Mantle</b> |                                |      |                                  |                                  |                                  |                    |                                   |                    |               |                                                       |            |               |
| MOR                   | 0.11                           | 8.0  | 1353                             | 1368                             | 1344                             | 41.2               | 1355                              | 1396               | -             | -                                                     | 1410       | 0             |
| <b>Ocean Islands</b>  |                                |      |                                  |                                  |                                  |                    |                                   |                    |               |                                                       |            |               |
| Azores                | 1.07                           | 9.3  | 1466                             | 1511                             | 1437                             | 50.0               | 1471                              | 1521               | 124           | 6.00                                                  | 1554       | 144           |
| Canary                | 1.37                           | 9.9  | 1498                             | 1553                             | 1470                             | 53.7               | 1507                              | 1561               | 164           | 7.51                                                  | 1597       | 188           |
| Cape Verde            | 1.78                           | 4.7  | 1497                             | 1526                             | 1452                             | 19.2               | 1492                              | 1511               | 114           | 6.09                                                  | 1558       | 148           |
| Caroline Is.          | 1.44                           | 7.5  | 1504                             | 1553                             | 1470                             | 37.8               | 1509                              | 1547               | 150           | 7.11                                                  | 1587       | 178           |
| Crozet                | 0.63                           | 10.9 | 1472                             | 1520                             | 1450                             | 60.8               | 1481                              | 1542               | 145           | 6.77                                                  | 1575       | 165           |
| Fernando de           | 2.17                           | 7.4  | 1530                             | 1586                             | 1492                             | 37.0               | 1536                              | 1573               | 176           | 8.06                                                  | 1617       | 207           |
| Galapagos             | 1.06                           | 6.1  | 1385                             | 1386                             | 1354                             | 28.9               | 1375                              | 1404               | 7             | 1.34                                                  | 1429       | 19            |
| Galapagos (VE)        | 1.06                           | 6.1  | 1458                             | 1497                             | 1431                             | 65.0               | 1462                              | 1527               | 130           | 8.34                                                  | 1556       | 147           |
| Gough                 | 1.52                           | 12.5 | 1470                             | 1529                             | 1442                             | 71.1               | 1481                              | 1552               | 155           | 7.03                                                  | 1581       | 171           |
| Grande Comore         | 1.49                           | 9.8  | 1496                             | 1547                             | 1466                             | 53.4               | 1503                              | 1557               | 160           | 7.32                                                  | 1593       | 183           |
| Hawaii                | 0.65                           | 25.6 | 1512                             | 1576                             | 1497                             | 158.7              | 1528                              | 1687               | 290           | 12.31                                                 | 1712       | 302           |
| Heard                 | 1.68                           | 12.9 | 1487                             | 1558                             | 1460                             | 73.7               | 1502                              | 1576               | 179           | 7.99                                                  | 1607       | 197           |
| Iceland               | 0.34                           | 21.0 | 1447                             | 1483                             | 1433                             | 128.3              | 1454                              | 1583               | 186           | 7.96                                                  | 1599       | 189           |
| Jan Mayen             | 1.20                           | 9.0  | 1418                             | 1456                             | 1395                             | 48.2               | 1423                              | 1471               | 74            | 4.02                                                  | 1497       | 87            |
| Juan                  | 1.91                           | 11.5 | 1507                             | 1569                             | 1476                             | 64.6               | 1517                              | 1582               | 185           | 8.20                                                  | 1617       | 207           |
| Kerguelen             | 0.39                           | 18.4 | 1487                             | 1531                             | 1468                             | 110.6              | 1496                              | 1606               | 209           | 9.15                                                  | 1636       | 226           |
| Louisville            | 1.20                           | 14.4 | 1503                             | 1557                             | 1480                             | 83.8               | 1513                              | 1597               | 200           | 8.81                                                  | 1631       | 221           |
| Madeira               | 1.24                           | 10.2 | 1496                             | 1545                             | 1467                             | 55.9               | 1503                              | 1558               | 161           | 7.40                                                  | 1595       | 185           |
| Marquesas             | 1.18                           | 11.6 | 1489                             | 1545                             | 1463                             | 65.2               | 1499                              | 1564               | 167           | 7.59                                                  | 1598       | 188           |
| Ninetyeast            | 0.47                           | 15.1 | 1469                             | 1508                             | 1448                             | 88.4               | 1475                              | 1563               | 166           | 7.48                                                  | 1593       | 183           |
| Pitcairn              | 1.17                           | 13.0 | 1498                             | 1567                             | 1468                             | 74.5               | 1511                              | 1586               | 189           | 8.33                                                  | 1618       | 208           |
| Reunion               | 0.52                           | 13.5 | 1485                             | 1537                             | 1463                             | 77.9               | 1495                              | 1573               | 176           | 7.91                                                  | 1606       | 196           |
| Ross/Erebus           | 0.99                           | 6.6  | 1490                             | 1539                             | 1448                             | 31.9               | 1493                              | 1525               | 128           | 6.27                                                  | 1563       | 153           |
| Samoa                 | 1.40                           | 16.5 | 1507                             | 1575                             | 1486                             | 97.9               | 1522                              | 1620               | 223           | 9.67                                                  | 1652       | 242           |
| Selvagen Is.          | 2.00                           | 7.3  | 1482                             | 1522                             | 1444                             | 36.3               | 1483                              | 1519               | 122           | 5.99                                                  | 1555       | 145           |
| St. Helena            | 1.04                           | 11.7 | 1486                             | 1538                             | 1462                             | 65.8               | 1495                              | 1561               | 164           | 7.48                                                  | 1595       | 185           |
| Tahiti/Society        | 1.35                           | 12.4 | 1499                             | 1562                             | 1474                             | 70.5               | 1511                              | 1582               | 185           | 8.27                                                  | 1617       | 207           |
| Trindade              | 2.33                           | 9.3  | 1572                             | 1654                             | 1537                             | 50.0               | 1588                              | 1639               | 242           | 10.16                                                 | 1684       | 274           |
| Tristan de            | 1.75                           | 11.2 | 1500                             | 1559                             | 1473                             | 62.7               | 1511                              | 1573               | 176           | 7.95                                                  | 1609       | 199           |

*F* is percent of partial melting determined from calculated primitive liquid compositions and equation A1 from Putirka et al. (2007);  
H<sub>2</sub>O<sup>p</sup> is wt. % water in the primitive liquid, which is based on *F*, and the bulk distribution and source concentration values in Dixon et

## Supplementary Document

---

al. (2002). All temperatures are in °C. (1) uses  $T = f(D_{Mg}, P, X_i)$  calibrated from low  $P$ , anhydrous experiments (Beattie, 1993), using empirical corrections for high  $P$  (Herzberg and O'Hara, 2002); (2) uses  $D_{Mg} = f(T, P, X_i)$ , calibrated from hydrous and anhydrous experiments at low and high  $P$  (Putirka et al., 2007, Eq. 2); (3) uses  $T = f(D_{Mg}, P, X_i)$ , calibrated as in (2) (Putirka et al., 2007; Eq. 4). All calculations use parental magma compositions calculated as noted in text, and  $Fo_{max}=91.5$ , except for Hawaii and Iceland, where  $Fo_{max}$  values are 91.3 and 92.0 respectively. All excess temperatures ( $T_{ex}$ ) for ocean islands are relative to  $T_p^{MOR}$  (Siqueiros), which represents ambient mantle (Fig. 1).  $T^{corr}$  (°C) is the thermal correction related to the heat of fusion and adiabatic upwelling ( $T_p = T^{ol-liq} + T^{corr}$ );  $T_{ex}(^{\circ}C) = T_p^{Oceans.} - T_p^{MOR}$ ;  $H_2O^p$  to get ( $T_{ex}=0$ ) is wt. % water needed in the primitive liquid to explain differences in  $T^{ol-liq}$  without an excess temperature.  $T_p(En)$  and  $T_{ex}(En)$  are the mantle potential and excess temperatures when  $F$  is calculated using the mean of estimates for  $F$  from equations A1 and A2 in Putirka et al. (2007) (a moderately enriched mantle). Because  $F$  is higher for enriched mantle compositions,  $T_p(En)$  and  $T_{ex}(En)$  are higher, for two reasons: high  $F$  means a greater upward correction for the heat of fusion, and for water dependent models, high means that  $H_2O$  is lower.

---

## Supplementary Document

Table DR2. Ocean Island isotope data

| Ocean Islands <sup>1</sup> | <sup>3</sup> He/ <sup>4</sup> He | <sup>208</sup> Pb/ <sup>204</sup> Pb | <sup>207</sup> Pb/ <sup>204</sup> Pb | <sup>206</sup> Pb/ <sup>204</sup> Pb | <sup>143</sup> Nd/ <sup>144</sup> Nd | <sup>87</sup> Sr/ <sup>86</sup> Sr |
|----------------------------|----------------------------------|--------------------------------------|--------------------------------------|--------------------------------------|--------------------------------------|------------------------------------|
|                            | max                              |                                      |                                      |                                      |                                      |                                    |
| Azores                     | 11.5                             | 39.24                                | 15.62                                | 19.47                                | 0.512865                             | 0.7038                             |
| Canary                     |                                  | 39.24                                | 15.58                                | 19.45                                | 0.512903                             | 0.7032                             |
| Cape Verde                 | 13.8                             | 39.04                                | 15.58                                | 19.42                                | 0.512881                             | 0.7032                             |
| Caroline Is.               |                                  |                                      |                                      |                                      | 0.512979                             | 0.7032                             |
| Crozet                     |                                  | 39.31                                | 15.61                                | 18.90                                | 0.512854                             | 0.7040                             |
| Fernando de Noronha        |                                  | 39.31                                | 15.63                                | 19.40                                | 0.512826                             | 0.7055                             |
| Galapagos (VE)             | 9.9                              | 38.95                                | 15.58                                | 19.20                                | 0.512958                             | 0.7042                             |
| Gough                      | 7.02                             | 38.84                                | 15.60                                | 18.42                                | 0.512574                             | 0.7047                             |
| Grande Comore              | 7.08                             | 39.41                                | 15.57                                | 19.08                                | 0.512751                             | 0.7037                             |
| Hawaii                     | 24.8                             | 38.01                                | 15.47                                | 18.36                                | 0.512990                             | 0.7035                             |
| Heard                      | 18.3                             | 38.54                                | 15.56                                | 18.07                                | 0.512592                             | 0.7055                             |
| Iceland                    | 34.3                             | 37.87                                | 15.44                                | 18.23                                | 0.513086                             | 0.7031                             |
| Jan Mayen                  |                                  |                                      |                                      |                                      |                                      |                                    |
| Juan Fernandez             | 16.6                             |                                      |                                      |                                      | 0.512870                             | 0.7035                             |
| Kerguelen                  | 17.5                             | 37.91                                | 15.47                                | 17.61                                | 0.512687                             | 0.7054                             |
| Louisville                 |                                  |                                      |                                      |                                      |                                      | 0.7034                             |
| Madeira                    | 6.7                              | 38.75                                | 15.53                                | 19.09                                | 0.513082                             | 0.7028                             |
| Marquesas                  |                                  | 39.04                                | 15.58                                | 19.25                                | 0.512837                             | 0.7041                             |
| Ninetyeast Ridge           |                                  | 38.94                                | 15.58                                | 18.66                                | 0.512870                             | 0.7048                             |
| Pitcairn                   | 10.6                             | 39.08                                | 15.57                                | 19.49                                | 0.512932                             | 0.7033                             |
| Reunion                    | 13.14                            | 38.97                                | 15.58                                | 18.84                                | 0.512838                             | 0.7042                             |
| Ross/Erebus                |                                  | 39.52                                | 15.64                                | 19.89                                |                                      | 0.7031                             |
| Samoa                      | 17.97                            | 39.52                                | 15.60                                | 19.30                                | 0.512768                             | 0.7051                             |
| Selvagen Is.               |                                  | 39.23                                | 15.57                                | 19.43                                | 0.512909                             | 0.7031                             |
| St. Helena                 | 5.9                              | 37.65                                | 15.75                                | 20.63                                | 0.512913                             | 0.7029                             |
| Tahiti/Society             |                                  | 38.85                                | 15.59                                | 19.10                                | 0.512813                             | 0.7045                             |
| Trindade                   |                                  | 38.78                                | 15.55                                | 18.99                                | 0.512791                             | 0.7037                             |
| Tristan de Cunha           | 6.3                              | 39.05                                | 15.54                                | 18.63                                | 0.512585                             | 0.7047                             |

<sup>1</sup>Data are from GEOROC and Class and Golstein, 1997; Class et al., 2005; Class et al., 1998; Claude-Ivanaj et al., 1998; Doucet et al., 2006; Geist et al., 2003; Honda and Woodhead (2005) Hopp and Tieloff (2005); Kurz et al., 2004; MacPherson et al., 2005; Workman et al., 2004.

## Supplementary Document

Table DR3. Parental liquid compositions (oxides in weight %), calculated using methods in Putirka et al. (2007)

| Location            | SiO <sub>2</sub> | TiO <sub>2</sub> | Al <sub>2</sub> O <sub>3</sub> | FeO  | MnO | MgO  | CaO  | Na <sub>2</sub> O | K <sub>2</sub> O | P <sub>2</sub> O <sub>5</sub> |
|---------------------|------------------|------------------|--------------------------------|------|-----|------|------|-------------------|------------------|-------------------------------|
| MORB-Siqueiros      | 48.5             | 0.9              | 15.9                           | 8.0  | 0.1 | 13.2 | 11.1 | 2.3               | 0.0              | 0                             |
| Azores              | 45.1             | 2.1              | 10.9                           | 11.1 | 0.2 | 18.2 | 9.2  | 2.1               | 0.9              | 0.3                           |
| Canary              | 43.7             | 2.5              | 9.5                            | 11.9 | 0.1 | 19.7 | 9.2  | 2.1               | 0.8              | 0.5                           |
| Cape Verde          | 41.5             | 2.7              | 9.5                            | 11.8 | 0.2 | 19.5 | 11.2 | 2.1               | 0.8              | 0.6                           |
| Caroline Is.        | 42.5             | 2.6              | 9.4                            | 11.9 | 0.1 | 19.8 | 9.9  | 2.3               | 0.9              | 0.6                           |
| Crozet              | 45.1             | 2.1              | 9.5                            | 11.5 | 0.1 | 18.9 | 10.2 | 1.7               | 0.7              | 0.3                           |
| Fernando de Nohrona | 41.4             | 2.6              | 8.7                            | 12.3 | 0.1 | 20.7 | 9.9  | 2.5               | 1.0              | 0.7                           |
| Galapagos           | 46.9             | 0.9              | 14.8                           | 9.3  | 0.1 | 14.7 | 11.0 | 2.1               | 0.0              | 0.1                           |
| Galapagos (VE)      | 46.4             | 2.0              | 11.9                           | 11.0 | 0.1 | 17.9 | 8.2  | 2.2               | 0.4              | 0.2                           |
| Gough               | 46.7             | 2.3              | 10.3                           | 11.1 | 0.1 | 18.1 | 7.5  | 2.2               | 1.3              | 0.3                           |
| Grande Comore       | 44.0             | 1.6              | 10.5                           | 11.8 | 0.2 | 19.4 | 9.1  | 2.3               | 0.8              | 0.3                           |
| Hawaii              | 47.2             | 1.6              | 9.0                            | 11.6 | 0.2 | 21.4 | 7.3  | 1.4               | 0.2              | -                             |
| Heard               | 45.9             | 2.8              | 8.9                            | 11.5 | 0.1 | 19.0 | 7.6  | 2.0               | 1.6              | 0.5                           |
| Iceland             | 47.2             | 0.7              | 12.3                           | 9.3  | 0.2 | 18.2 | 10.5 | 1.4               | 0.1              | -                             |
| Jan Mayen           | 46.9             | 2.0              | 10.0                           | 10.0 | 0.1 | 16.1 | 11.6 | 1.8               | 1.3              | 0.3                           |
| Juan Fernandez      | 44.5             | 2.1              | 10.2                           | 11.9 | 0.1 | 19.7 | 7.5  | 2.6               | 0.9              | 0.4                           |
| Kerguelen           | 47.5             | 0.7              | 11.3                           | 12.0 | 0.2 | 19.9 | 6.9  | 1.4               | 0.1              | 0.1                           |
| Louisville          | 45.0             | 2.0              | 9.9                            | 12.2 | 0.1 | 20.4 | 7.8  | 1.8               | 0.4              | 0.3                           |
| Madeira             | 43.9             | 2.1              | 10.4                           | 11.9 | 0.2 | 19.7 | 8.8  | 2.0               | 0.6              | 0.4                           |
| Marquesas           | 44.8             | 2.6              | 9.6                            | 11.8 | 0.1 | 19.4 | 8.5  | 1.9               | 0.9              | 0.4                           |
| Ninetyeast Ridge    | 47.1             | 0.9              | 11.9                           | 11.5 | 0.2 | 18.9 | 7.7  | 1.5               | 0.3              | 0.1                           |
| Pitcairn            | 45.6             | 2.4              | 10.5                           | 11.7 | 0.1 | 19.4 | 6.4  | 1.9               | 1.7              | 0.4                           |
| Reunion             | 45.7             | 1.9              | 10.1                           | 11.8 | 0.1 | 19.5 | 8.2  | 1.8               | 0.5              | 0.2                           |
| Ross/Erebus         | 43.4             | 2.7              | 10.7                           | 11.3 | 0.2 | 18.5 | 8.5  | 3.0               | 1.1              | 0.6                           |
| Samoa               | 45.3             | 2.5              | 9.2                            | 12.0 | 0.2 | 20.5 | 8.0  | 1.8               | 0.7              | -                             |
| Selvagen Is.        | 44.0             | 2.0              | 10.6                           | 11.2 | 0.2 | 18.3 | 9.4  | 2.7               | 0.8              | 0.8                           |
| St. Helena          | 44.9             | 2.2              | 9.8                            | 11.8 | 0.1 | 19.4 | 9.0  | 1.8               | 0.7              | 0.3                           |
| Tahiti/Society      | 44.7             | 2.5              | 9.2                            | 12.0 | 0.1 | 19.9 | 8.4  | 1.8               | 1.0              | 0.4                           |
| Trindade            | 40.3             | 2.8              | 7.7                            | 13.0 | 0.1 | 22.4 | 8.7  | 2.8               | 1.3              | 0.7                           |
| Tristan             | 44.1             | 2.4              | 9.8                            | 12.0 | 0.1 | 19.9 | 8.5  | 1.9               | 1.0              | 0.4                           |
